# Supplementary material for: Iron, coronary artery calcification, and mortality in patients undergoing hemodialysis
Source: PubMed Central journal article supplement (PMC7894440; doi:10.1080/0886022x.2021.1880937), 2021-02-18
Supplement: IRNF_A_1880937_SM7537.pdf [file IRNF_A_1880937_SM7537.pdf]

**Supplementary Table: Predictors of 5-year all-cause mortality in hemodialysis patients, according to Cox proportional hazard analyses, and using the dose of all phosphate binders as a variable**

| Variables                                          | Multivariate analyses |           |          |         |           |          |         |           |          |
|----------------------------------------------------|-----------------------|-----------|----------|---------|-----------|----------|---------|-----------|----------|
|                                                    | Model 1               |           |          | Model 2 |           |          | Model 3 |           |          |
|                                                    | HR                    | 95% CI    | <i>P</i> | HR      | 95% CI    | <i>P</i> | HR      | 95% CI    | <i>P</i> |
| Age (years)                                        | 1.06                  | 1.03–1.10 | <0.01    | 1.06    | 1.02–1.10 | <0.001   | 1.06    | 1.02–1.10 | <0.001   |
| Male sex                                           | 1.02                  | 0.53–1.93 | 0.94     | 1.03    | 0.55–1.98 | 0.93     | 1.10    | 0.58–2.13 | 0.77     |
| Smoking                                            | 1.20                  | 0.61–2.37 | 0.59     | 1.34    | 0.68–2.67 | 0.40     | 1.36    | 0.69–2.70 | 0.38     |
| Presence of diabetes mellitus                      | 1.30                  | 0.66–2.53 | 0.45     | 1.29    | 0.66–2.50 | 0.46     | 1.11    | 0.56–2.16 | 0.76     |
| Duration of dialysis (months)                      | 1.00                  | 0.99–1.00 | 0.32     | 1.00    | 0.99–1.00 | 0.24     | 1.00    | 0.99–1.00 | 0.38     |
| CACS                                               | 1.01                  | 1.00–1.01 | <0.0001  | 1.01    | 1.00–1.01 | <0.0001  | 1.01    | 1.00–1.01 | <0.0001  |
| Serum albumin (g/dL)                               | 0.63                  | 0.29–1.37 | 0.24     | 0.78    | 0.35–1.74 | 0.53     | 0.58    | 0.26–1.28 | 0.17     |
| Serum CRP (g/dL)                                   | 1.67                  | 1.22–2.29 | <0.01    | 1.62    | 1.15–2.19 | <0.01    | 1.68    | 1.19–2.26 | <0.01    |
| Log serum intact FGF23 (pg/mL)                     | 0.95                  | 0.64–1.42 | 0.82     | 0.90    | 0.60–1.34 | 0.60     | 0.90    | 0.62–1.33 | 0.60     |
| Erythropoietin responsiveness index (unit/kg/g/dL) | 1.03                  | 1.01–1.06 | <0.01    | 1.03    | 1.01–1.05 | <0.05    | 1.05    | 1.02–1.08 | <0.01    |
| Dose of all phosphate binders (g/day)*             | 0.51                  | 0.28–0.93 | <0.05    | 0.53    | 0.28–0.94 | <0.05    | 0.53    | 0.27–0.94 | <0.05    |
| TSAT $\geq$ 17%                                    | 0.55                  | 0.32–0.97 | <0.05    |         |           |          |         |           |          |
| Fe $\geq$ 63 $\mu$ g/dL                            |                       |           |          | 0.54    | 0.30–0.97 | <0.05    |         |           |          |
| Ferritin $\geq$ 200 ng/mL                          |                       |           |          |         |           |          | 0.27    | 0.06–0.87 | <0.05    |

CACS: coronary artery calcification score, CRP: C-reactive protein, FGF23: fibroblast growth factor 23, TSAT: transferrin saturation, Fe: serum iron, Ferritin: serum ferritin, Erythropoietin responsiveness index was defined as the average weekly erythropoiesis stimulating agent (ESA) dose divided by dry weight and average blood hemoglobin. \*The prescribed doses of phosphate-binding agents were converted to daily defined doses (DDDs), using the conversion factors provided by the World Health Organization Drug Classification (<http://www.whooc.no/atcddd/>), and they are expressed as prescribed weekly dose/7 DDD value. The phosphate binders used were calcium carbonate (DDD: 3 g), sevelamer (DDD: 6.4 g), and lanthanum carbonate (DDD: 2.25 g), and other phosphate binders were not prescribed at our institution in 2012.

HR: hazard ratio, CI: confidence interval, For continuous variables, the HRs were computed per unit increase.
